# Supplementary material for: Mental Fatigue Monitoring Using a Wearable Transparent Eye Detection System
Source: PubMed Central journal article supplement (PMC6189833; doi:10.3390/mi7020020), 2016-01-26
Supplement: micromachines-07-00020-s001.pdf [file micromachines-07-00020-s001.pdf]

# Supplementary Materials: Mental Fatigue Monitoring Using a Wearable Transparent Eye Detection System

Kota Sampei, Miho Ogawa, Carlos Cesar Cortes Torres, Munehiko Sato and Norihisa Miki

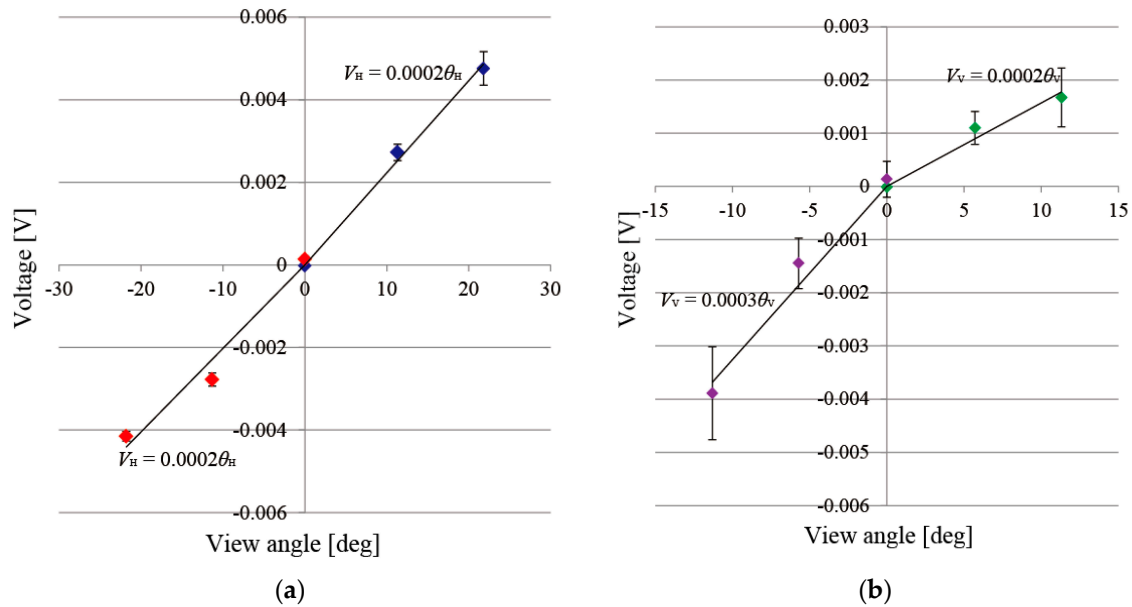

**Figure S1.** Relations between the viewing angle and the output voltage (a)  $V_H$  and (b)  $V_V$  for one subject. These relations are obtained to calibrate the system prior to the monitoring experiments.

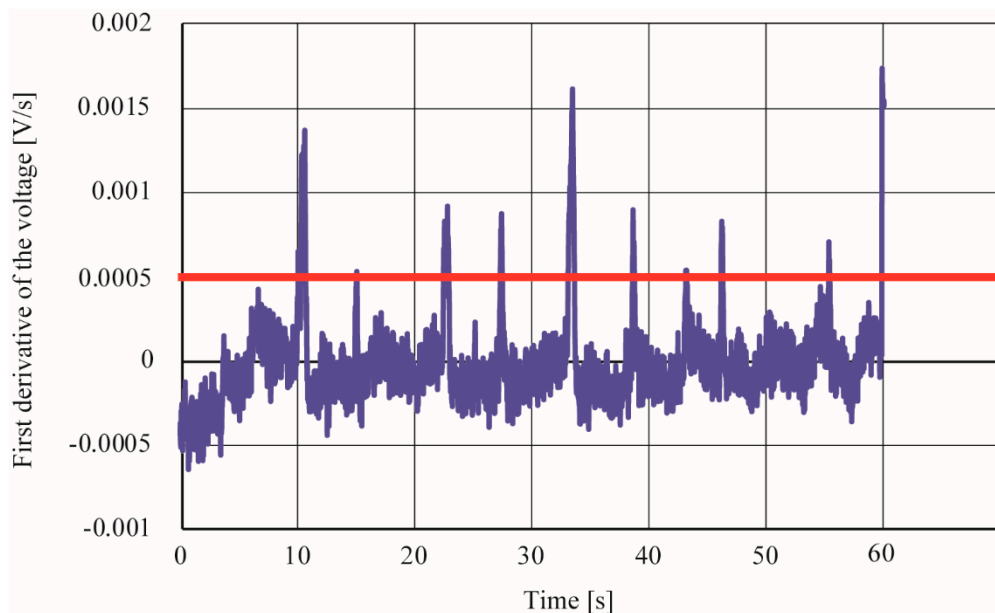

**Figure S2.** First derivative of the output voltage of the sensor when the subjects blinked naturally. The blinks were detected for 60 s while the subject was not requested any tasks.

**Table S1.** Acquired information for subject A.

| <b>The Number of the Tasks</b> | <b>Upper</b> | <b>Bottom</b> | <b>Left</b> | <b>Right</b> | <b>Upper-Left</b> | <b>Upper-Right</b> | <b>Bottom-Left</b> | <b>Bottom-Right</b> | <b>Eye Movement (°)</b> | <b>No. of Blinks</b> | <b>No. of Multiple Blinks</b> |
|--------------------------------|--------------|---------------|-------------|--------------|-------------------|--------------------|--------------------|---------------------|-------------------------|----------------------|-------------------------------|
| 1                              | 0.39         | 0.61          | 0.10        | 0.90         | 0.04              | 0.35               | 0.07               | 0.54                | 2080                    | 45                   | 14                            |
| 2                              | 0.64         | 0.36          | 0.63        | 0.37         | 0.44              | 0.20               | 0.19               | 0.17                | 3692                    | 34                   | 12                            |
| 3                              | 0.04         | 0.96          | 0.05        | 0.95         | 0.00              | 0.04               | 0.04               | 0.92                | 3053                    | 36                   | 7                             |
| 4                              | 0.99         | 0.01          | 0.03        | 0.97         | 0.02              | 0.97               | 0.00               | 0.00                | 3130                    | 45                   | 12                            |
| 5                              | 0.40         | 0.60          | 0.00        | 1.00         | 0.00              | 0.39               | 0.00               | 0.60                | 1921                    | 34                   | 6                             |
| 6                              | 0.93         | 0.07          | 0.85        | 0.15         | 0.80              | 0.14               | 0.06               | 0.01                | 1998                    | 31                   | 5                             |
